# Supplementary material
Source: Research Square preprint supplement (doi:10.21203/rs.3.rs-9373179/v1)
Supplement: Supplementary file 1 [file cabd41524a5917c673edb3fb.docx]

**STROBE Statement—Checklist of items that should be included in reports of observational studies**

| Item No. | Recommendation | Page No. | Relevant text from manuscript |
| --- | --- | --- | --- |
| 1(a) | Indicate the study’s design with a commonly used term in the title or the abstract | 1 | “This retrospective cross-sectional study included children aged 0–18 years…” |
| 1(b) | Provide in the abstract an informative and balanced summary of what was done and what was found | 1 | “This study aimed to determine the prevalence of low bone mass… and to examine the relationship…” |
| 2 | Explain the scientific background and rationale for the investigation being reported | 2 | “Bone mineral density (BMD) progressively increases throughout childhood…” |
| 3 | State specific objectives, including any prespecified hypotheses | 2 | “This study aims to determine the prevalence of low bone mass for age…” |
| 4 | Present key elements of study design early in the paper | 3 | “This retrospective cross-sectional study employed consecutive sampling…” |
| 5 | Describe the setting, locations, and relevant dates | 3 | “Radiological records were retrieved… between January 2019 and December 2025…” |
| 6(a) | Give the eligibility criteria and sources and methods of selection of participants | 3 | “The study population consisted of children older than 28 days up to 18 years…” |
| 6(b) | Matching criteria (if applicable) | N/A | Not applicable |
| 7 | Clearly define all outcomes, exposures, predictors, confounders | 4 | “Independent variables included age, sex, BMI, lean mass, and fat mass…” |
| 8 | Give sources of data and details of methods of assessment | 3–4 | “All bone mineral assessments were performed using… DXA Scanner…” |
| 9 | Describe efforts to address bias | 9 | “The referral-based nature of the cohort introduces potential selection bias…” |
| 10 | Explain how the study size was arrived at | 5 | “A total of 66 pediatric patients were included…” |
| 11 | Explain how quantitative variables were handled | 4 | “Continuous variables were summarized using mean and standard deviation…” |
| 12(a) | Describe statistical methods | 4 | “Correlation analysis… and multiple linear regression analysis were performed…” |
| 12(b) | Describe subgroup/interactions methods | 6 | “Hierarchical multivariable linear regression analysis…” |
| 12(c) | Explain how missing data were addressed | Not reported | Not explicitly stated |
| 12(d) | Describe analytical methods taking account of sampling strategy | 3 | “This study employed consecutive sampling…” |
| 12(e) | Describe sensitivity analyses | Not reported | Not performed |
| 13(a) | Report numbers of individuals at each stage | 5 | “yielding a total of 66 pediatric patients included…” |
| 13(b) | Give reasons for non-participation | Not reported | Not explicitly described |
| 13(c) | Consider use of a flow diagram | 5 | “(Figure 1)” |
| 14(a) | Give characteristics of study participants | 5–6 | “mean age 13.8 ± 2.7 years… majority male (74.2%)…” |
| 14(b) | Indicate number of participants with missing data | Not reported | Not specified |
| 14(c) | Summarise follow-up time | N/A | Not applicable |
| 15 | Report outcome events or summary measures | 5 | “Low bone mass for age was identified in 22.7%…” |
| 16(a) | Give estimates and confidence intervals | 6–7 | “β = 0.065, 95% CI 0.046–0.085…” |
| 16(b) | Report category boundaries | 5 | “normoweight (78.8%), overweight (9.1%), obese (6.1%)…” |
| 16(c) | Translate relative risk into absolute risk if relevant | N/A | Not applicable |
| 17 | Report other analyses | 6–7 | “Hierarchical multivariable regression…” |
| 18 | Summarise key results | 7 | “approximately one in five children… ALMI strongest predictor…” |
| 19 | Discuss limitations | 9 | “retrospective design… small sample… referral bias…” |
| 20 | Provide overall interpretation | 7–9 | “These findings support the mechanostat theory…” |
| 21 | Discuss generalisability | 9 | “may not represent the general pediatric population.” |
| 22 | Give source of funding | Not reported | Not stated |
